# Supplementary material for: A yeast suppressor screen links Coa4 to the mitochondrial copper delivery pathway for cytochrome c oxidase
Source: Oxford University Press journal article supplement (doi:10.1093/genetics/iyac090), 2022-06-06
Supplement: iyac090_supplementary_figure_s1.pdf [file iyac090_supplementary_figure_s1.pdf]

**A**

pRS416 plasmids

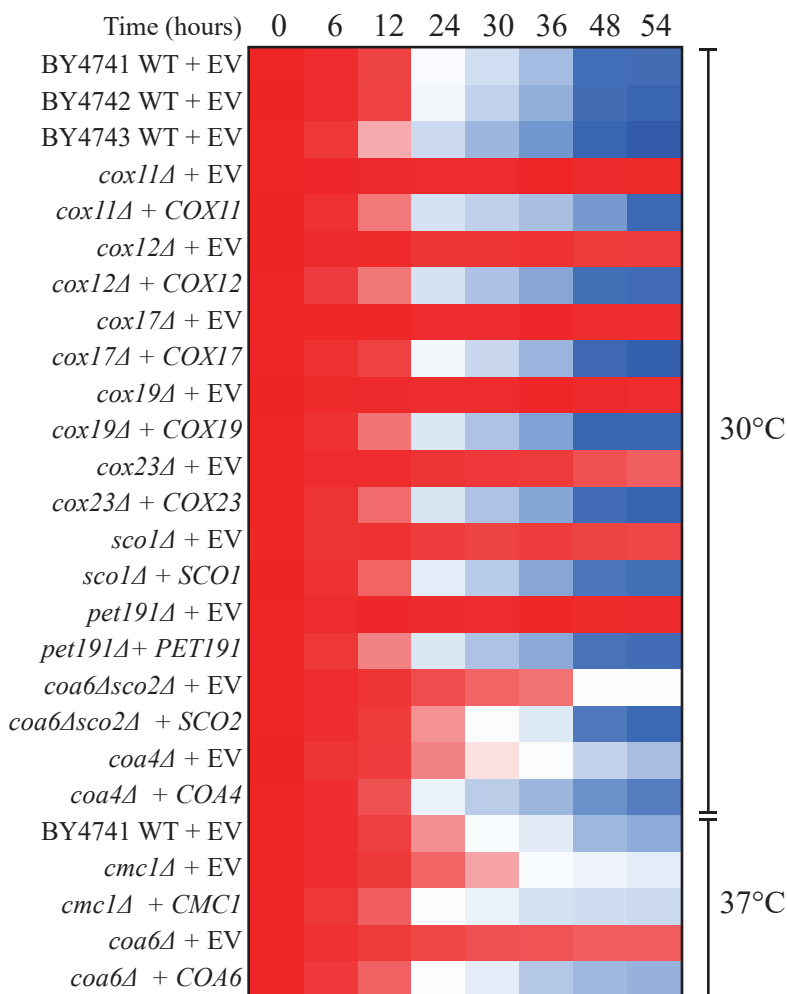**B**

pRS415 plasmids

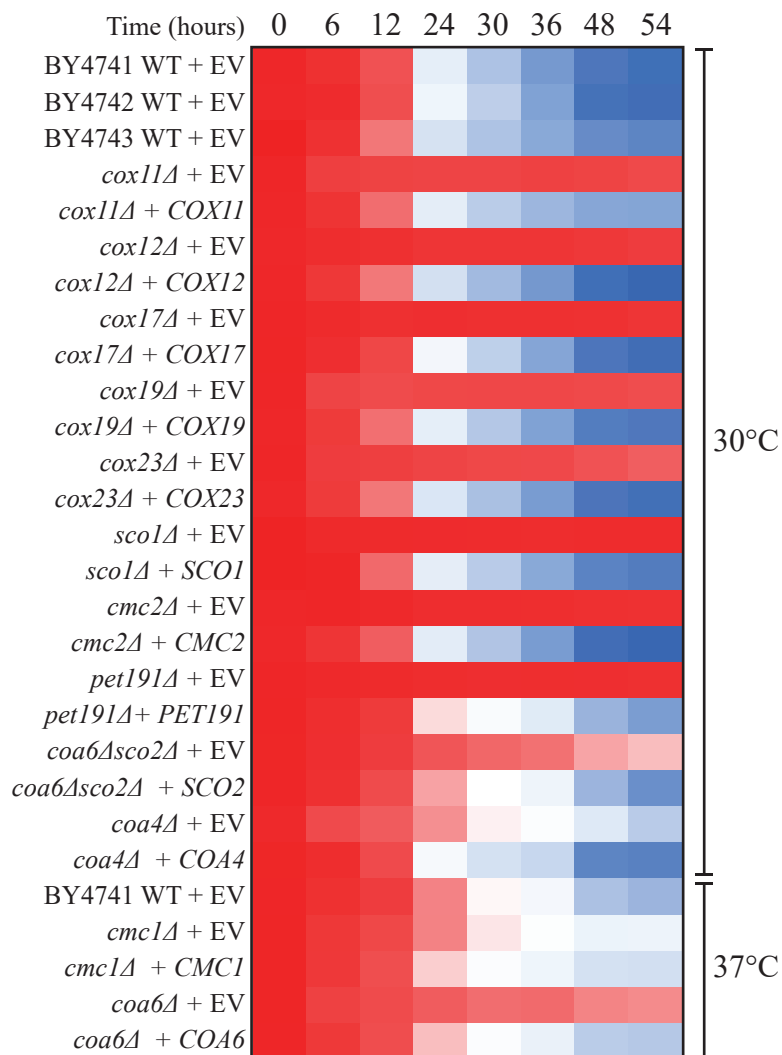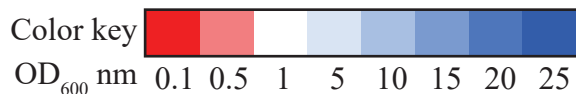

**Supplementary Figure S1.** The plasmids used in this study express functional proteins. (A) The indicated yeast knockout strains were transformed with either the pRS416 empty vector or the corresponding gene in pRS416 plasmid and were grown in YPGE at a starting OD of 0.1. The growth was monitored by measuring the absorbance at 600 nm. (B) Same as (A) but pRS415 plasmids were used.
