# Supplementary material for: A yeast suppressor screen links Coa4 to the mitochondrial copper delivery pathway for cytochrome c oxidase
Source: Oxford University Press journal article supplement (doi:10.1093/genetics/iyac090), 2022-06-06
Supplement: iyac090_supplementary_figure_s2.pdf [file iyac090_supplementary_figure_s2.pdf]

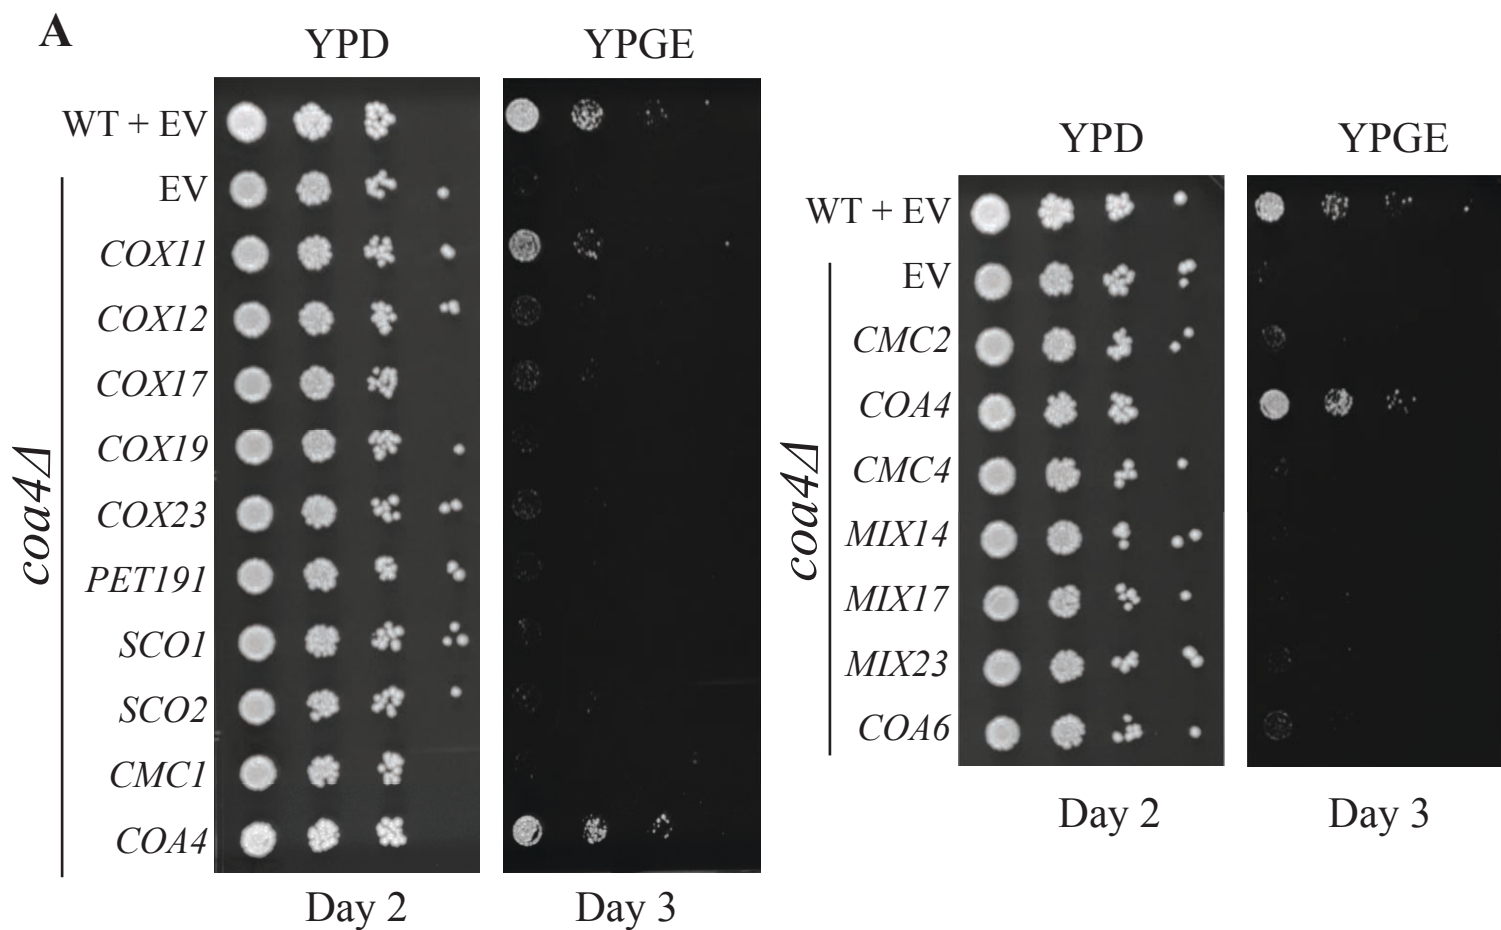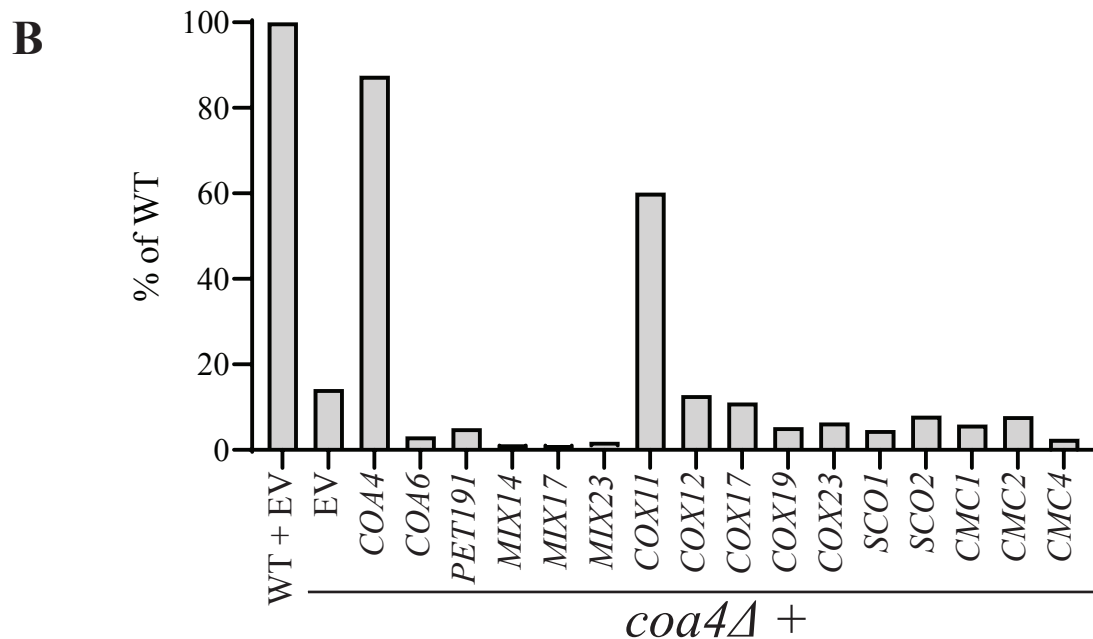

**Supplementary Figure S2.** Cox11 overexpression rescues the respiratory defect of *coa4Δ*. (A) Ten-fold serial dilutions of the indicated transformants were seeded onto YPD and YPGE plates and were incubated at 30°C. Images were taken on the indicated days. (B) Quantification of the growth of the transformants in (A). The growth of each transformant in YPGE was normalized to its growth in YPD and expressed as a percentage of WT.
