# Supplementary material for: A yeast suppressor screen links Coa4 to the mitochondrial copper delivery pathway for cytochrome c oxidase
Source: Oxford University Press journal article supplement (doi:10.1093/genetics/iyac090), 2022-06-06
Supplement: iyac090_supplementary_figure_s3.pdf [file iyac090_supplementary_figure_s3.pdf]

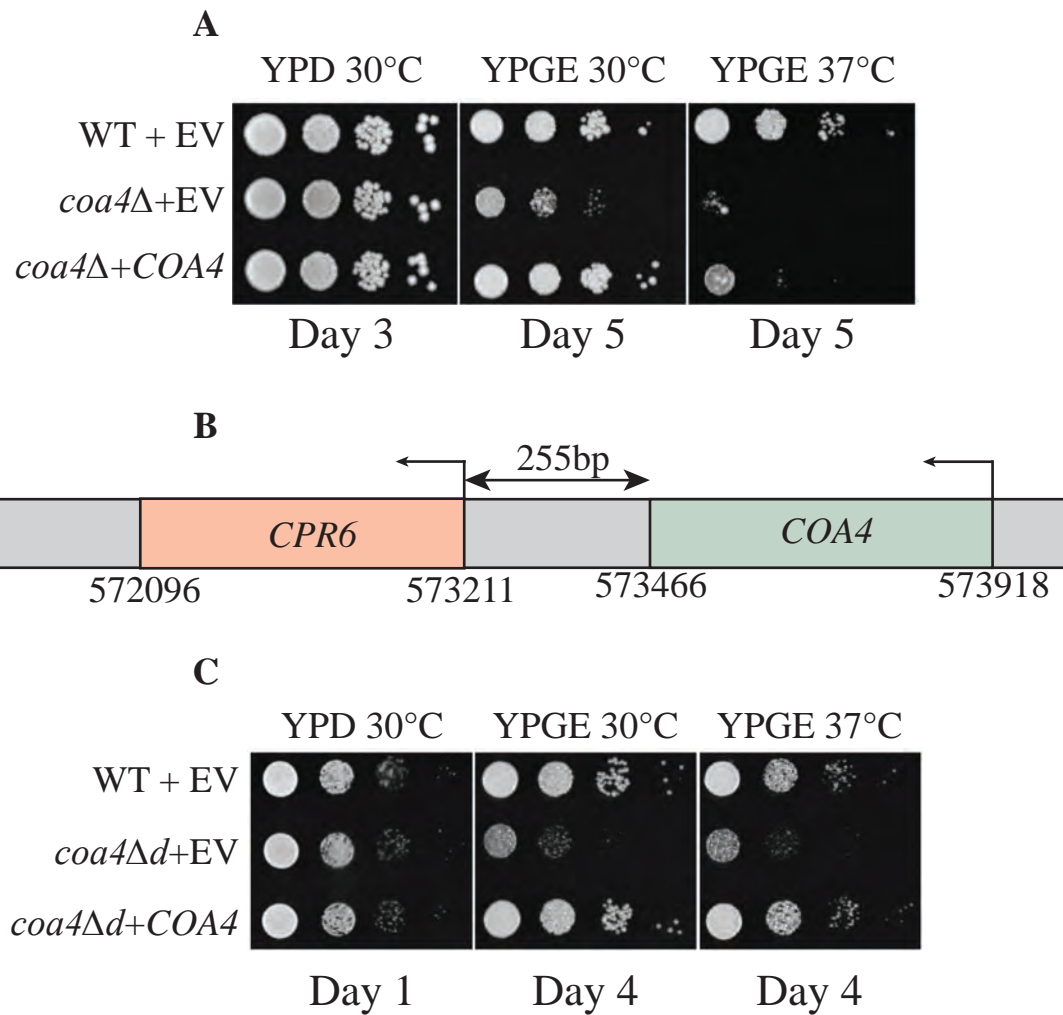

**Supplementary figure S3.** (A) Ten-fold serial dilutions of the indicated transformants were seeded onto YPD and YPGE plates and were incubated at either 30°C or 37°C. (B) Genome location of *CPR6* and *COA4* on chromosome XII of yeast. (C) Ten-fold serial dilutions of the indicated transformants were seeded onto YPD and YPGE plates and were incubated at either 30°C or 37°C. Images were taken on the indicated days.
