# Supplementary material for: A yeast suppressor screen links Coa4 to the mitochondrial copper delivery pathway for cytochrome c oxidase
Source: Oxford University Press journal article supplement (doi:10.1093/genetics/iyac090), 2022-06-06
Supplement: iyac090_supplementary_figure_s4.pdf [file iyac090_supplementary_figure_s4.pdf]

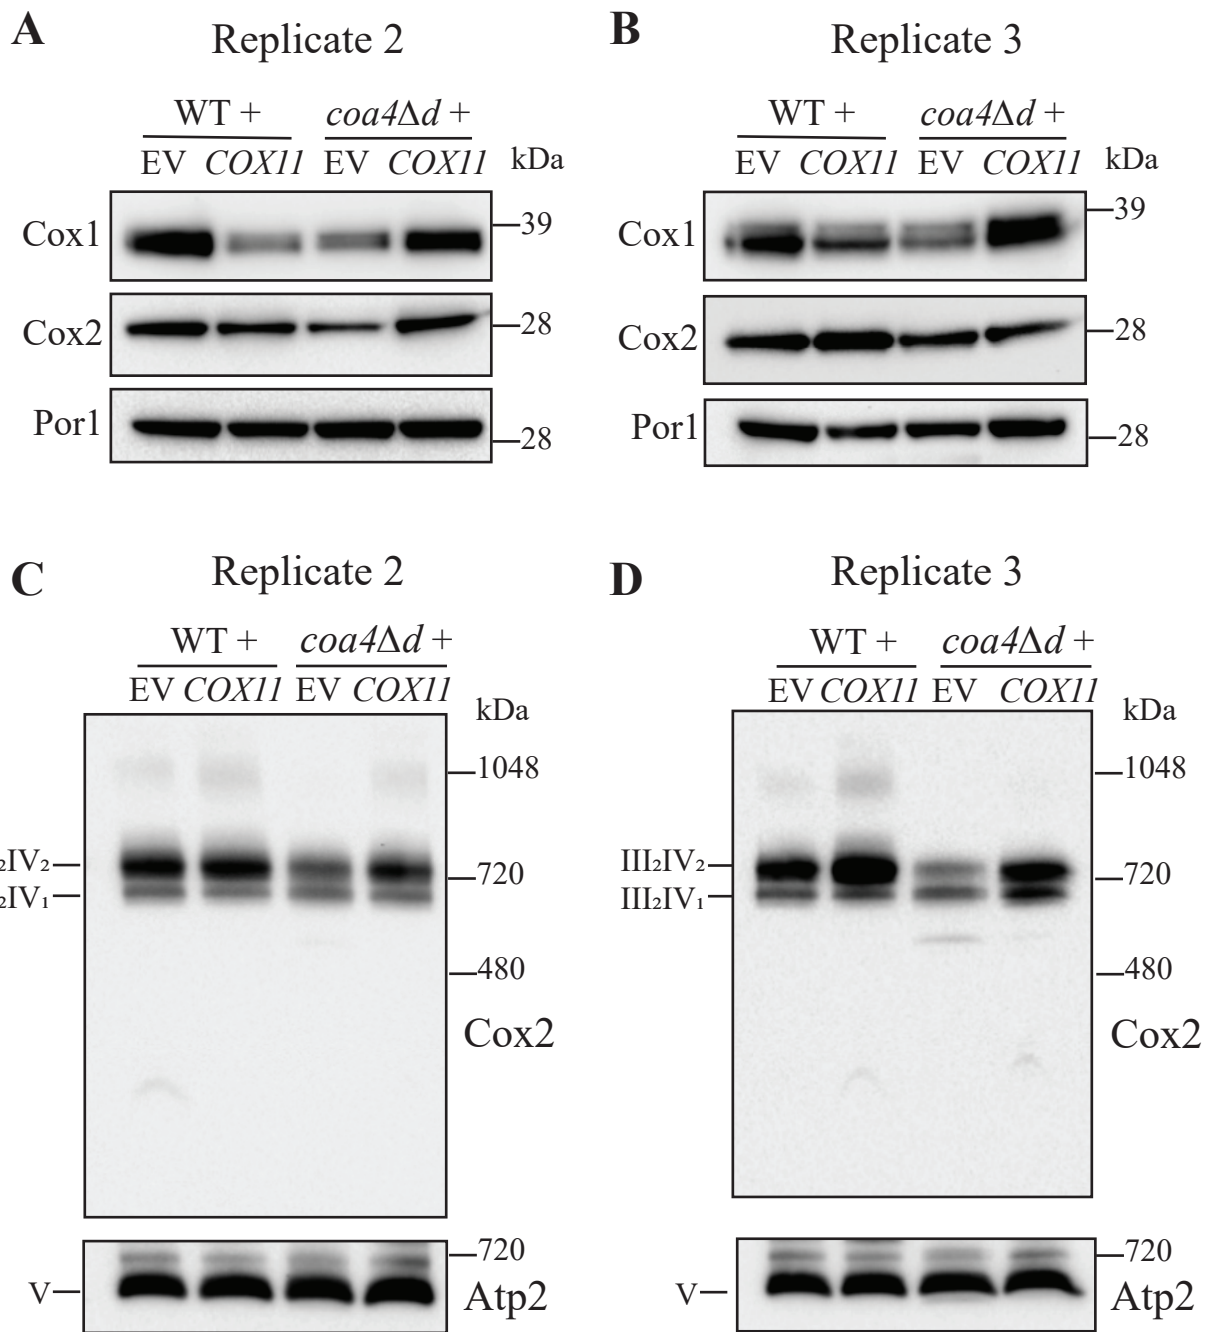

**Supplementary Figure S4.** (A) Replicate 2 and (B) replicate 3 of figure 3B. (C) Replicate 2 and (D) replicate 3 of figure 3C.
