# Supplementary material for: A yeast suppressor screen links Coa4 to the mitochondrial copper delivery pathway for cytochrome c oxidase
Source: Oxford University Press journal article supplement (doi:10.1093/genetics/iyac090), 2022-06-06
Supplement: iyac090_supplementary_figure_s5.pdf [file iyac090_supplementary_figure_s5.pdf]

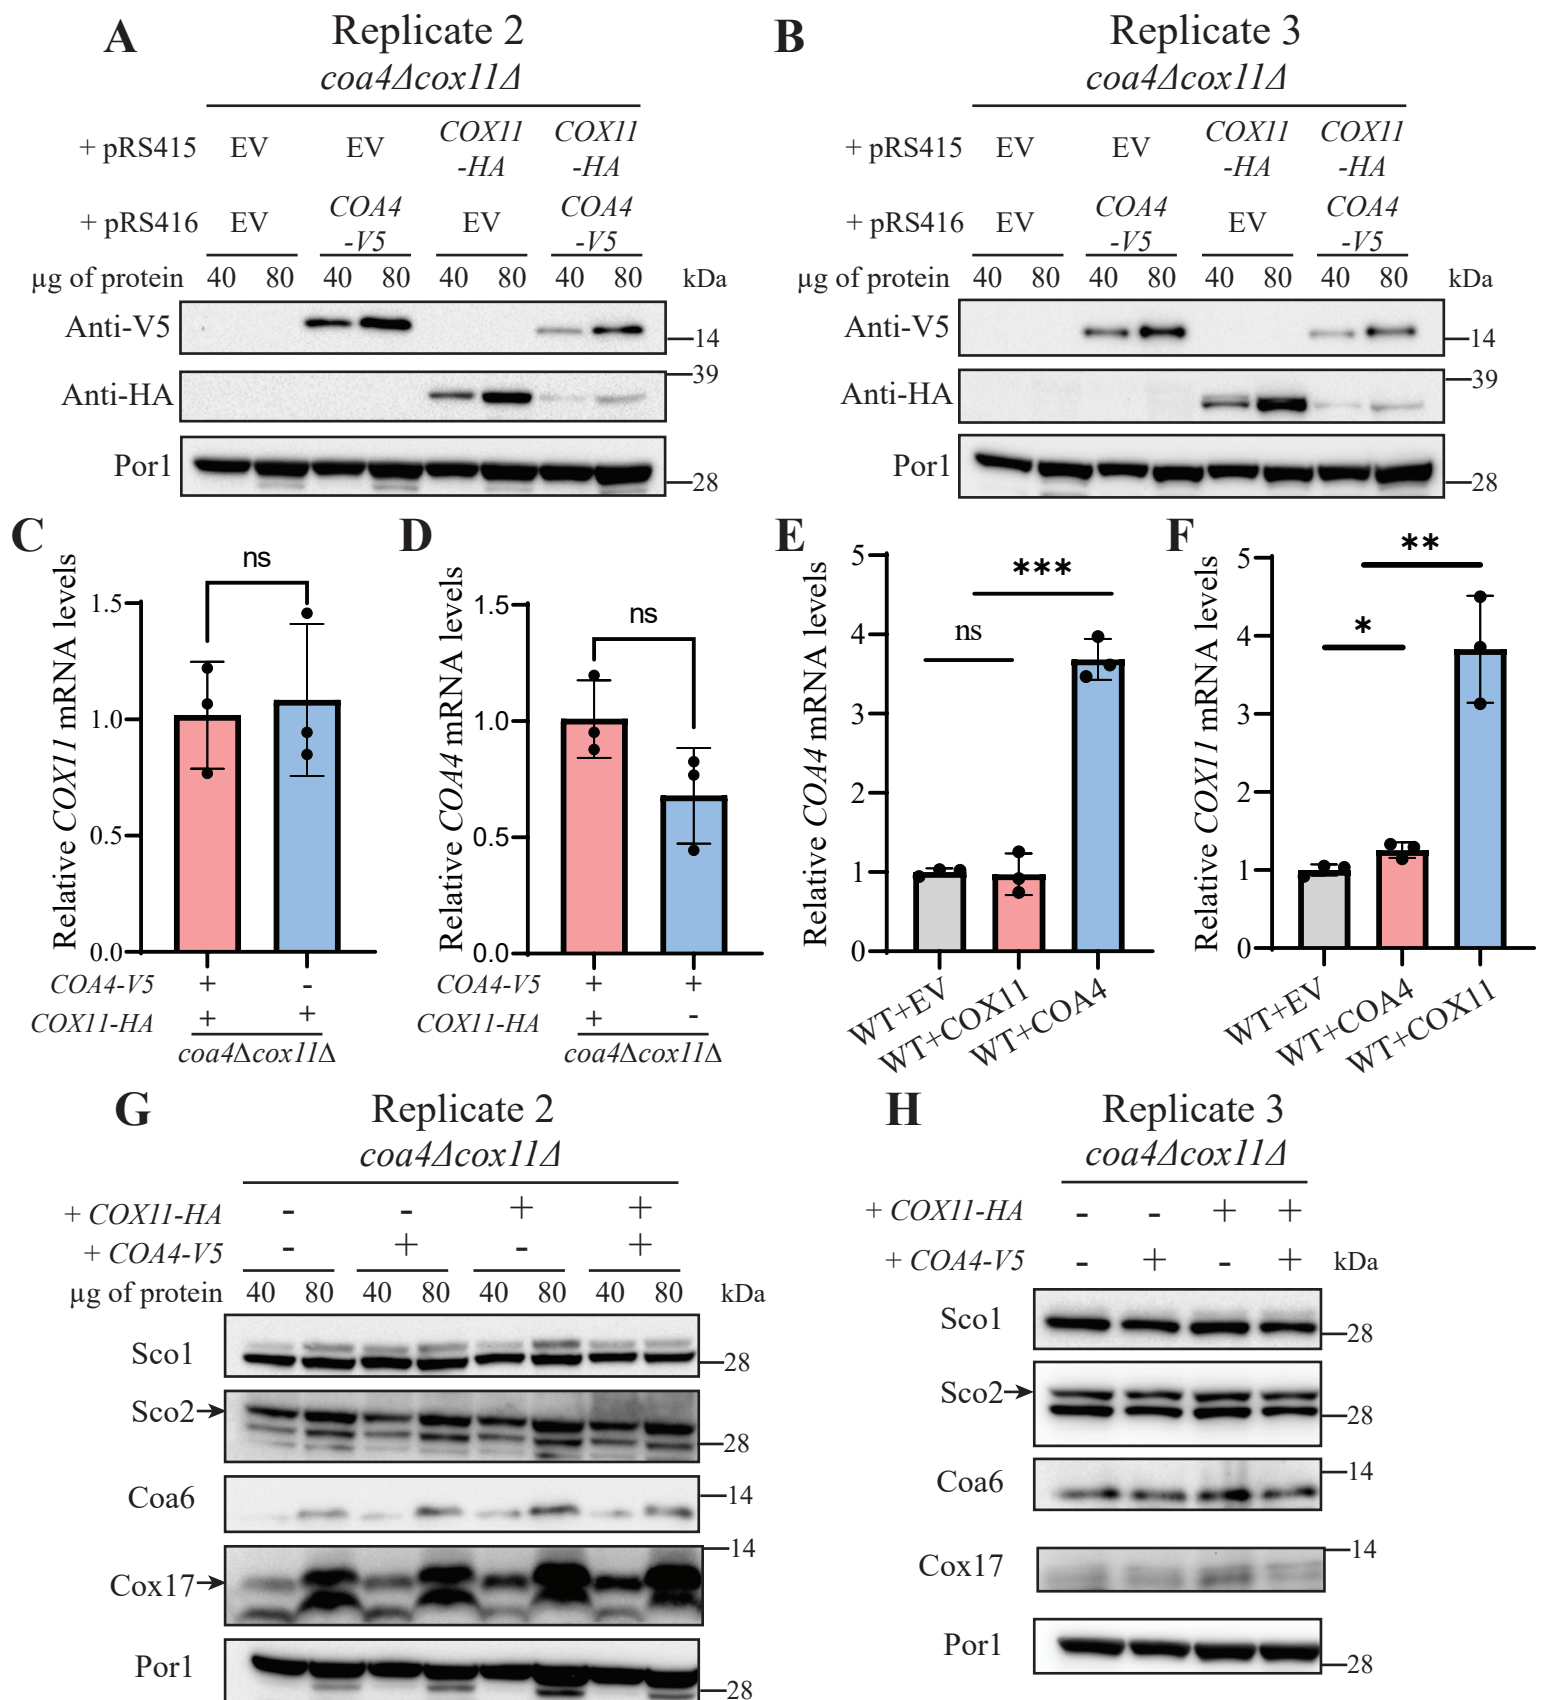

**Supplementary Figure S5.** (A) Replicate 2 and (B) replicate 3 of figure 4A. (C and F) *COX11* and (D and E) *COA4* mRNA levels in the indicated strains were measured by qRT-PCR. The cells were grown in YPGalactose media to mid-log phase before isolating RNA. The mRNA levels were normalized to *ACT1* expression and shown as mean  $\pm$  SD, with each data point representing a biological replicate; \*  $p < 0.05$ , \*\*  $p < 0.01$ , \*\*\*  $p < 0.001$  ( $n = 3$ ). (G) Replicate 2 and (H) replicate 3 of figure 4C. 40  $\mu$ g of proteins/lane were loaded in panel H.
