# Supplementary material for: A yeast suppressor screen links Coa4 to the mitochondrial copper delivery pathway for cytochrome c oxidase
Source: Oxford University Press journal article supplement (doi:10.1093/genetics/iyac090), 2022-06-06
Supplement: iyac090_supplementary_figure_s6.pdf [file iyac090_supplementary_figure_s6.pdf]

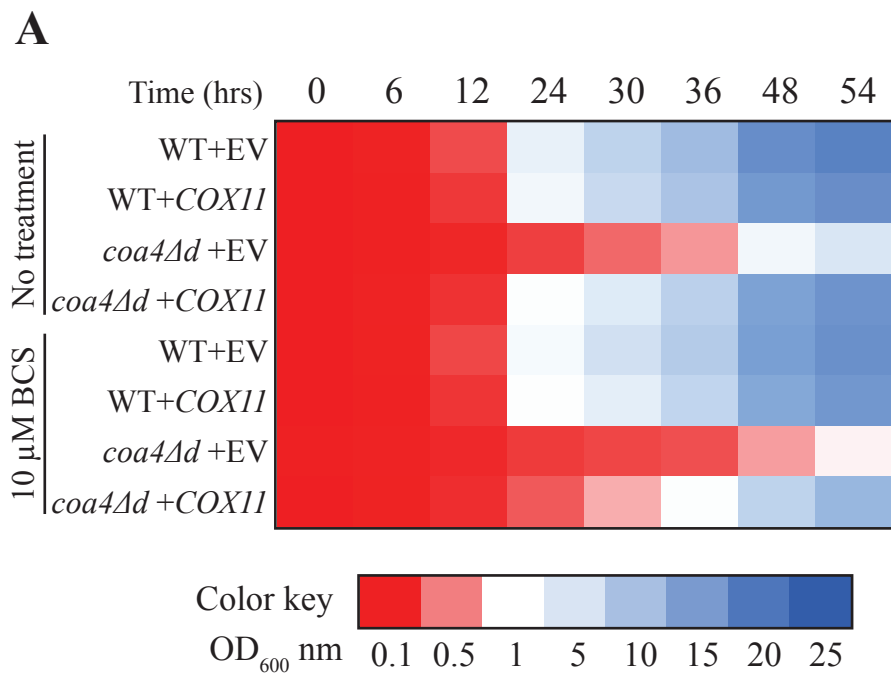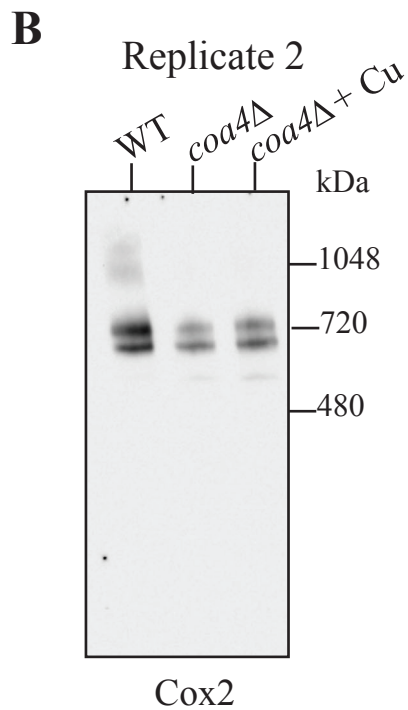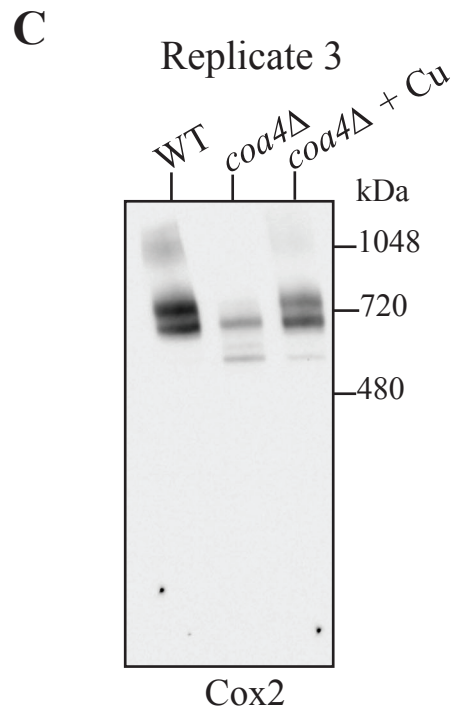

**Supplementary Figure S6.** (A) The indicated cells were inoculated in YPGE at a starting OD<sub>600nm</sub> of 0.1 and were grown at 30°C. The growth was monitored by measuring the absorbance at 600 nm. BCS was added at a final concentration of 10  $\mu$ M. (B) Replicate 2 and (C) replicate 3 of figure 5E.
