# Supplementary material for: A yeast suppressor screen links Coa4 to the mitochondrial copper delivery pathway for cytochrome c oxidase
Source: Oxford University Press journal article supplement (doi:10.1093/genetics/iyac090), 2022-06-06
Supplement: iyac090_supplementary_table_s1.pdf [file iyac090_supplementary_table_s1.pdf]

| Gene                 | Forward primer (FP)                                         | Reverse Primer (RP)                                          |
|----------------------|-------------------------------------------------------------|--------------------------------------------------------------|
| <i>COX11</i>         | GGGATA <b>CCGCGG</b> TTGACGCACCTAG<br>AACATGGACGTT          | CCCTAT <b>GCATGC</b> TTAATTTGAGTTGT<br>CTTTCCTTGTGTCTA       |
| <i>COX12</i>         | GGGAAG <b>GAGCTC</b> AGGCTAAAATGCT<br>TGGCGTACTTCT          | CCCCTA <b>GGATCC</b> TTAGTCTGAGTTG<br>ATATCACCTGCG           |
| <i>COX17</i>         | GGGCGT <b>GAGCTC</b> TGGACTCGCCCTC<br>TGCTAGAAAGTT          | CCCTCA <b>GGATCC</b> CCTAATTTGCACTTG<br>GAACTTCGAAGCCA       |
| <i>COX19</i>         | GGGTTA <b>GAGCTC</b> CGCGTCAGTTGAG<br>TAGTAATCGTCC          | CCCTGT <b>GGATCC</b> CTATTTATTATCGG<br>TGGCGTCTTTTATGGT      |
| <i>COX23</i>         | GGGCCG <b>GAGCTC</b> CTGTATTCGTCTC<br>CACAGTGGCAGC          | CCCAAG <b>GGATCC</b> TCATTCCCCTGC<br>TGTCTGTTTTCTC           |
| <i>PET191</i>        | GGGAAT <b>GAGCTC</b> AAAAGAAAAGAAA<br>ATCAGATCCAATGGCTAACTC | CCCCAT <b>GGATCC</b> TCAGTCCTTCTGCT<br>GGCTGTTTCTGAG         |
| <i>SCO1</i>          | GGGTGG <b>GAGCTC</b> TTAGATTGGTCAT<br>AGCTATCCTCCAACT       | CCCTTT <b>GGATCC</b> TTATTTGAATAAGA<br>AGGAGTACCATGCCTC      |
| <i>SCO2</i>          | GGGCTG <b>GAGCTC</b> TAAATTGGTCGTT<br>GAATTGACTTTTTAAGACATC | CCCTTT <b>GGATCC</b> TCAATTGAAGATA<br>AAAGAGTACCATTTTTTGGACC |
| <i>CMC1</i>          | GGGCCT <b>GAGCTC</b> AACCAACAGCTTT<br>TTTATCAAAGTCCAATATTTA | CCCCA <b>GGATCC</b> TTATTTTGTAGAG<br>CTTTGTTTTTGACATAACTTTTC |
| <i>CMC2</i>          | GGGGTT <b>GAGCTC</b> CTTTCCAGACGT<br>TGCTTTAGTTCCTGA        | CCCAA <b>GGATCC</b> TTATTTTCGAGTTC<br>GCATCATTGTCACTTTC      |
| <i>COA4</i>          | GGGTT <b>GAGCTC</b> CTCCATTAGTAG<br>TATAACCGGGCG            | CCCTTT <b>GGATCC</b> TCATTTCTTCTTTTC<br>CGAATCCTTACTGGT      |
| <i>CMC4</i>          | GGGGCA <b>GAGCTC</b> TCGAACAGCCAGC<br>TCTTTTTGAGGG          | CCCTT <b>GGATCC</b> TCAACTGTCCCCTG<br>GTGTAAGCTTTTC          |
| <i>MIX14</i>         | GGGTTT <b>CCGCGG</b> TATAACCCATTAT<br>TTGAGCAGGCTCATCAT     | CCCCCT <b>GCATGC</b> TCAGTCCTTGATTA<br>ATTCCAAGTTTACTCC      |
| <i>MIX17</i>         | GGGTT <b>CCGCGG</b> GGGTTTGTGTTTGT<br>TTGACCCTTTAGGTA       | CCCCTT <b>GCATGC</b> TTAGTATTGACGTG<br>CAGCTTCTGCG           |
| <i>MIX23</i>         | GGGTGG <b>GAGCTC</b> TAGAAAGGCCGA<br>ATCGAAGTATGAG          | CCCAT <b>GGATCC</b> TCAACTGTTGTCCT<br>TGCAGAATTGCG           |
| <i>COX16</i>         | CCCCTT <b>GAGCTC</b> AGATCTGGGAAGG<br>TTTCAACTCATT          | CCCTTT <b>GGATCC</b> TTACCAGACATTCT<br>CAGATTCATCC           |
| <i>COA4 promoter</i> | GGGTT <b>GAGCTC</b> CTCCATTAGTAG<br>TATAACCGGGCG            | CCCGG <b>ACTAGT</b> GACCAGTCTGCCA<br>GTTTTAGCCTGC            |
| <i>hsCOA4</i>        | CCCTGC <b>ACTAGT</b> ATGTCTACCTCTGT<br>TCCACAAGGTC          | CCCTGC <b>GGATCC</b> TTAATGATGAGCA<br>CCAGCTTGTTCTTGACG      |
| <i>hsCOA4-V5</i>     | CCCTGC <b>ACTAGT</b> ATGTCTACCTCTGT<br>TCCACAAGGTC          | CCCTGC <b>GGATCC</b> TTAGGTAGAGTCC<br>AAACCTAGCAATGG         |

**Supplementary Table 1.** The primers used for the amplification of genes in this study. The restriction sites used for cloning the genes are shown in red. The genes were amplified and cloned in pRS416 vector and were then subcloned into pRS415 vector. For human *COA4* cloning, *COA4\_promoter* was first cloned in pRS416 vector and *hsCOA4* or *hsCOA4-V5* were then cloned subsequently downstream of the promoter in the same vector.
