# Supplementary material for: A yeast suppressor screen links Coa4 to the mitochondrial copper delivery pathway for cytochrome c oxidase
Source: Oxford University Press journal article supplement (doi:10.1093/genetics/iyac090), 2022-06-06
Supplement: iyac090_supplementary_table_s2.pdf [file iyac090_supplementary_table_s2.pdf]

| <b>Mutant gene</b>    | <b>Forward Primer (FP)</b>                                        | <b>Reverse Primer (RP)</b>                                         |
|-----------------------|-------------------------------------------------------------------|--------------------------------------------------------------------|
| <i>COX11-C111A-HA</i> | CGGTACCACTCTATAGAGCC<br>ATTGCTGCTCGTACTGG                         | CCAGTACGAGCAGCAATGGCTCTA<br>TAGAGTGGTACCG                          |
| <i>COX11-C208A-HA</i> | GAAGCAGCTCAATACTTTAA<br>TAAAATCCAAGCTTTTGGCTT<br>TGAAGAACAAAAGCTA | TAGCTTTTGGTCTTCAAAGCAAAA<br>AGCTTGGATTTTATTAAAGTATTG<br>AGCTGCTTC  |
| <i>COX11-C210A-HA</i> | GAAGCAGCTCAATACTTTAA<br>TAAAATCCAATGTTTGCCTT<br>TGAAGAACAAAAGCTAG | CTAGCTTTTGGTCTTCAAAGGCAA<br>AACATTGGATTTTATTAAAGTATT<br>GAGCTGCTTC |

**Supplementary Table 2.** The primers used for mutagenesis are shown. Quikchange Lightning mutagenesis kit was used and the pRS416 plasmid containing the corresponding wildtype gene was used as a template for amplification.
